# Supplementary material for: What we learned from the Dust Bowl: lessons in science, policy, and adaptation
Source: PubMed Central journal article supplement (PMC4015056; doi:10.1007/s11111-013-0190-z), 2013-08-28
Supplement: 11111_2013_190_MOESM1_ESM.pdf [file 11111_2013_190_MOESM1_ESM.pdf]

**Dust Bowl inventory questionnaire**

Completed by:

|  |
|--|
|  |
|  |

Date:

**TOMBSTONE DATA**

Lead author family name:

Year published:

Article title:

Journal title:

Journal field code (see choices at column F):

First author affiliation:

ENTER DATA IN CELLS BELOW

|  |
|--|
|  |
|  |
|  |
|  |
|  |
|  |

**QUANTITATIVE MEASURES**

System of primary interest:

Physical processes only (e.g. drought)

Human processes only (e.g. migration)

Both to some substantive degree of investigation

ENTER A 1 IF YES, 0 IF NO

|  |
|--|
|  |
|  |
|  |

Spatial scale of process(es) of interest:

Local/community

Sub-regional within Great Plains

Great Plains region

North America

Other region or continent(s)

Global

ENTER 1 IF YES, 0 IF NO  
(ONLY ONE CELL CAN = 1)

|  |
|--|
|  |
|  |
|  |
|  |
|  |
|  |

Which of following time scales is the author attempting to understand the behavior of the sytem?

Long term past (i.e >100 years past)

Dust bowl period only (mid 1920s-WWII)

Recent past including Dust Bowl

Recent past since Dust Bowl

Current/ongoing processes

Future behavior

ENTER 1 IF YES, 0 IF NO  
(ONLY ONE CELL CAN = 1)

|  |
|--|
|  |
|  |
|  |
|  |
|  |
|  |

Past + present + future  
Other (add remark)

|  |
|--|
|  |
|  |

Remark: \_\_\_\_\_

ENTER 1 FOR YES, 0 FOR NO  
(ENTER AS MANY 1s AS APPLY)

If a physical system/process is subject of study, which of the following is being studied

Atmospheric/climate processes  
Biology other than agriculture  
Crop science, other agric science excluding soil  
Human health  
Hydrological processes  
Soil science, other geology/geomorphology  
Other (add remark)

|  |
|--|
|  |
|  |
|  |
|  |
|  |
|  |
|  |

Remark: \_\_\_\_\_

ENTER 1 FOR YES, 0 FOR NO  
ENTER AS MANY 1s AS APPLY

If an atmospheric/climate process is subject of study, which of following is being studied (choose as many as apply)

Air circulation, patterns, current  
Anthropogenic climate change  
ENSO/other climate oscillations/anomalies  
Evapotranspiration  
Meteorological drought  
Modelling climate  
Paleoclimatology  
Other (add remark)

|  |
|--|
|  |
|  |
|  |
|  |
|  |
|  |
|  |
|  |

\*

Remark: \_\_\_\_\_

\*If you enter a 1 here, enter remark in qualitative question at line 81 below

ENTER 1 FOR YES, 0 FOR NO  
ENTER AS MANY 1s AS APPLY

If a human system/process is subject of study, which of following is being studied (choose as many as apply)

Agricultural processes  
Climate adaptation  
Culture (includes literature)  
Economic processes, micro

|  |
|--|
|  |
|  |
|  |
|  |

\*

Economic processes, macro  
Gender issues  
Institutional behavior (incl. law, politics)  
Social behavior/social networks  
Other (add remark)

|  |
|--|
|  |
|  |
|  |
|  |
|  |

Remark: \_\_\_\_\_

\*If you enter a 1 here, enter remark in qualitative question at line 81 below

ENTER 1 FOR YES, 0 FOR NO

Does the article/author make explicit recommendations for land use/management/tenure policies or practices? (If yes, enter a note in the qualitative field at line 85)

|  |
|--|
|  |
|--|

#### QUALITATIVE ANALYSIS

1. What are the key conclusions of the article?

Enter data in the form of "highlights" (see instruction at row 97 below)

Highlight 1:

Highlight 2:

Highlight 3:

Highlight 4 (if necessary):

Highlight 5 (if necessary):

|  |
|--|
|  |
|  |
|  |
|  |
|  |

2. In addition to the highlights entered in qualitative question 1, are there additional insights into understanding anthropogenic climate change contained in this article? If yes, add information in this field (separate ideas with semi-colons):

|  |
|--|
|  |
|--|

3. If the article makes specific recommendations for land use, management or tenure, add information in this field:

|  |
|--|
|  |
|--|

4. To facilitate writing the discussion sections of our article, enter here any additional relevant information that needs to be captured. For example, does the article raise issues that seem to have been forgotten by present day natural/social scientists? Are there any "surprise"/unexpected findings in this article? Etc  
Enter point-form notes in this field:

|  |
|--|
|  |
|--|

Use this field for any additional information you wish to record for easy recall later:

#### INSTRUCTIONS FOR HIGHLIGHTS

Highlights consist of a short collection of 3-5 bullet points that convey the core findings of the article (maximum 100 characters per bullet point). Strive for simple terms, minimize use of adjectives, adverbs. Avoid synonyms/using multiple words to describe a common idea. Coding is simplified when the same terms are used repeatedly across bullets and across questionnaires.

Examples of highlights:

Highlight 1:

Farm abandonment during drought is higher on sandy soils

Highlight 2:

Farmers seek off-farm employment to offset lost income due to crop failure

Highlight 3:

Most who left farms migrated to cities within region

Highlight 4:

Social networks facilitate migration

Journal code Journal field

- 1 Agricultural science/agronomy/crop science/vet science
- 2 Atmospheric science/meteorology
- 3 Biology/ecology/entomology (excluding agricultural sciences)
- 4 Demography/migration/population studies
- 5 Economics
- 6 Geography, physical: includes soil science, geomorphology, geology
- 7 History
- 8 Humanities (includes education, folklore, literature)
- 9 Multidisciplinary (e.g. *Climatic Change*, *Global Environmental Change*)
- 10 Political science, law, public administration
- 11 Water resources, water management, hydrology, irrigation
- 0 Other (add remark)

VOCABULARY FOR QUALITATIVE REMARKS

*Cross-cutting terms*

adaptation

agriculture

family

health

institutions

land tenure

migration

perception

poverty

technology

social network

soil

women

*Use instead of*

survival, adjustment, coping, etc

farming, crop production, etc

illness, wellness, pneumonia

government, other formal institutions

sharecropping, land renting, land ownership etc

refugee, immigration, displacement, etc

subjective or emotional interpretations of phenomena

destitution, economic difficulty, etc

any equipment, machinery, innovations

social connections, friends & relatives, etc

gender, farm women, etc
